# Supplementary material
Source: publisher site journal article supplement (https://www.spandidos-publications.com/7572/downloadSupplementary)
Supplement: Supplementary file 1 [file downloadSupplementary]

## Sheet: MCC
Top 50 in network string_interactions_short.tsv ranked by Maximal Clique Centrality method
Rank	Name	Score
1	IL1B	21269
2	PPARG	20422
3	PTEN	18622
4	CD44	16114
5	CAV1	15721
6	TLR4	15674
7	TIMP1	12761
8	MAPK3	10984
9	TGFBR1	7694
10	ATM	3179
11	MAPK14	2331
12	CYBB	2210
13	CTSB	1878
14	SMAD7	1814
15	DPP4	1561
16	EPAS1	1445
17	TXN	933
18	ACSL4	764
19	FTH1	755
20	SLC40A1	751
21	FTL	750
22	SLC7A11	749
23	MUC1	747
23	STEAP3	747
25	SAT1	726
26	MAP1LC3B	478
27	SNCA	421
28	NEDD4	381
29	FURIN	244
30	ALOX15	84
31	ALOX5	80
32	LCN2	79
33	FLT3	78
34	SOCS1	72
35	RPTOR	62
36	CDC25A	32
37	ALOX15B	30
38	G6PD	28
39	SLC25A28	25
40	CBS	19
41	IDH1	18
42	GABARAPL2	14
42	PGD	14
44	NEDD4L	13
45	ATG3	12
45	LPIN1	12
47	RRM2	9
48	KIF20A	8
48	SIAH2	8
50	CDCA3	6

## Sheet: EPC
Top 50 in network string_interactions_short.tsv ranked by , Edge Percolated Component method
Rank	Name	Score
1	IL1B	23.716999999999977
2	PPARG	23.070999999999984
3	PTEN	22.547999999999977
4	MAPK3	21.08699999999996
5	TLR4	20.939999999999994
6	CD44	20.56200000000001
7	CAV1	20.348999999999997
8	ATM	19.816999999999982
9	TXN	18.919999999999977
10	TIMP1	18.91499999999999
11	TGFBR1	18.393999999999977
12	CTSB	17.27699999999995
13	SMAD7	17.174999999999972
14	MAP1LC3B	16.96999999999996
15	MAPK14	16.856999999999967
16	CYBB	16.83799999999997
17	NEDD4	16.408999999999985
18	SNCA	16.22299999999995
19	EPAS1	16.074999999999925
20	DPP4	15.632999999999933
21	MUC1	14.553999999999943
22	SLC7A11	14.53999999999997
23	ACSL4	13.666999999999973
24	ALOX15	13.655999999999977
25	FURIN	13.568999999999951
26	RPTOR	13.143999999999975
27	SOCS1	13.135999999999926
28	LCN2	12.98099999999996
29	FLT3	12.812999999999947
30	IDH1	12.081999999999953
31	ALOX5	11.862999999999955
32	CBS	11.797999999999965
33	SLC40A1	11.612999999999976
34	FTH1	11.346999999999978
35	CDC25A	10.181999999999976
36	G6PD	10.173999999999989
37	STEAP3	10.067999999999962
38	GABARAPL2	9.787999999999986
39	FTL	9.519
40	LPIN1	9.149000000000003
41	NEDD4L	9.052000000000005
42	ATG3	8.993000000000007
43	SAT1	8.875000000000012
44	CD82	8.377000000000068
45	ALOX15B	8.087000000000032
46	SIAH2	7.892000000000036
47	CGAS	7.564000000000081
48	RRM2	7.460000000000025
49	GDF15	7.393000000000056
50	USP11	7.1010000000000515

## Sheet: DMNC
Top 50 in network string_interactions_short.tsv ranked by Density of Maximum Neighborhood Component method
Rank	Name	Score
1	DPP4	0.6997747436526056
2	SAT1	0.6219883543440194
3	CAV1	0.6192202069905893
4	FTL	0.5831456197105046
5	SOCS1	0.5705899531365685
6	SLC25A28	0.5683937124413994
7	CTSB	0.5561289178825689
8	MUC1	0.5539883387249794
8	STEAP3	0.5539883387249794
10	CYBB	0.5429782250998597
11	MAPK14	0.5414939463593434
12	CD44	0.5342945807023384
13	EPAS1	0.5250617899814665
14	TGFBR1	0.5207726924614138
15	ALOX15B	0.51861
16	LCN2	0.5122257035774278
16	FLT3	0.5122257035774278
18	TIMP1	0.5115297362096173
19	SMAD7	0.4975890317896669
20	TLR4	0.49743235057689517
21	SLC40A1	0.4773288999831513
22	MAP1LC3B	0.47260468783194354
23	FURIN	0.4665164957684037
24	KIF20A	0.46346305677196975
24	CDCA3	0.46346305677196975
24	ACSL1	0.46346305677196975
24	CFL1	0.46346305677196975
24	SIAH2	0.46346305677196975
24	GDF15	0.46346305677196975
24	ALOX12B	0.46346305677196975
24	USP11	0.46346305677196975
24	CD82	0.46346305677196975
33	SNCA	0.4581378774280066
34	PTEN	0.44031484843399005
35	FTH1	0.43895770929315353
36	ATM	0.4371501114837314
37	MAPK3	0.4261331799410804
38	NEDD4	0.42441417417353944
39	RPTOR	0.40820193379735326
40	ALOX5	0.40572956498567864
41	ATG3	0.388958
41	PGD	0.388958
41	NEDD4L	0.388958
41	LPIN1	0.388958
45	ALOX15	0.3790998398440872
46	RRM2	0.37892914162759955
47	IL1B	0.3756504775053534
48	PPARG	0.3668097140510996
49	CDC25A	0.3658755025553056
50	SLC7A11	0.36587428808063743

## Sheet: MNC
Top 50 in network string_interactions_short.tsv ranked by Maximum Neighborhood Component method
Rank	Name	Score
1	IL1B	32
2	PPARG	30
3	PTEN	26
4	MAPK3	23
5	TLR4	20
6	ATM	17
6	TXN	17
6	CD44	17
9	TIMP1	16
9	CAV1	16
11	TGFBR1	15
11	ACSL4	15
13	MAP1LC3B	13
14	SLC7A11	12
14	NEDD4	12
14	CTSB	12
14	MAPK14	12
14	SMAD7	12
19	CYBB	11
19	SNCA	11
21	ALOX15	10
21	FTH1	10
23	EPAS1	9
23	ALOX5	9
23	SLC40A1	9
26	MUC1	8
26	RPTOR	8
26	FTL	8
26	STEAP3	8
26	DPP4	8
26	G6PD	8
26	FURIN	8
26	IDH1	8
34	SAT1	7
34	LCN2	7
34	FLT3	7
34	CBS	7
34	CDC25A	7
39	GABARAPL2	6
39	SOCS1	6
41	ATG3	5
41	ALOX15B	5
41	PGD	5
41	NEDD4L	5
41	LPIN1	5
46	RRM2	4
46	SLC25A28	4
48	SLC39A8	3
48	KIF20A	3
48	MT1G	3

## Sheet: Degree
Table SIV. Top 50 ferroptosis-related DEGs (FRDEGs) ranked by five algorithms of protein-protein interaction network.
Rank	Name	Score
1	IL1B	33
2	PPARG	30
3	PTEN	26
4	MAPK3	23
5	TXN	20
5	TLR4	20
7	CD44	19
8	ATM	18
9	TIMP1	17
9	CAV1	17
9	ACSL4	17
12	SLC7A11	15
12	TGFBR1	15
14	NEDD4	13
14	MAP1LC3B	13
14	MAPK14	13
17	SNCA	12
17	CTSB	12
17	SMAD7	12
17	SLC40A1	12
21	CYBB	11
21	FTH1	11
23	ALOX15	10
23	EPAS1	10
23	RPTOR	10
26	MUC1	9
26	ALOX5	9
26	STEAP3	9
26	DPP4	9
30	LCN2	8
30	FTL	8
30	CBS	8
30	G6PD	8
30	FURIN	8
30	IDH1	8
36	SAT1	7
36	FLT3	7
36	CDC25A	7
39	GABARAPL2	6
39	NEDD4L	6
39	SOCS1	6
42	KIF20A	5
42	ATG3	5
42	ALOX15B	5
42	SIAH2	5
42	PGD	5
42	RRM2	5
42	LPIN1	5
42	SLC25A28	5
50	POR	4
